# Supplementary material
Source: publisher figshare collection journal article supplement (https://tandf.figshare.com/articles/dataset/_/6139028)

## Supplementary Information

### Seasonality habitat type and locality influenced

Sulaiman I Muhammad, Rosli Ramli and Amy Y Then

Ostrich. 2018. DOI: 10.2989/00306525.2018.1425927

### Appendix S1: Number of individual bird species recorded during dry and wet seasons in Dutse, Nigeria

| Species                                                      | Dry | Rainy | Total | Black-shouldered Kite ( <i>Elanus caeruleus</i> )                    | 7    | 6   | 13   | Fine-spotted Woodpecker ( <i>Campethera punctuligera</i> )     | 2   |     | 2   |
|--------------------------------------------------------------|-----|-------|-------|----------------------------------------------------------------------|------|-----|------|----------------------------------------------------------------|-----|-----|-----|
| Abyssinian Roller ( <i>Coracias abyssinicus</i> )            | 46  | 18    | 64    | Blue-naped Mousebird ( <i>Urocolius macrourus</i> )                  | 5    |     | 5    | Fork-tailed Drongo ( <i>Dicrurus adsimilis</i> )               | 19  | 1   | 20  |
| African Cuckoo ( <i>Cuculus gularis</i> )                    | 1   | 3     | 4     | Brown Babbler ( <i>Turdoides plebejus</i> )                          | 340  | 119 | 459  | Four-banded Sandgrouse ( <i>Pterocles quadricinctus</i> )      |     | 2   | 2   |
| African Golden Oriole ( <i>Oriolus auratus</i> )             | 1   | 5     | 6     | Bruce's Green Pigeon ( <i>Treron waalia</i> )                        | 20   | 12  | 32   | Gabar Goshawk ( <i>Micronisus gabar</i> )                      | 24  | 2   | 26  |
| African Grey Hornbill ( <i>Tockus nasutus</i> )              | 34  | 38    | 72    | Cattle Egret ( <i>Bubulcus ibis</i> )                                | 217  | 160 | 377  | Grasshopper Buzzard ( <i>Butastur rufipennis</i> )             | 1   |     | 1   |
| African Harrier Hawk ( <i>Polyboroides typus</i> )           | 1   |       | 1     | Chestnut-backed Sparrow Lark ( <i>Eremopterix leucotis</i> )         | 25   |     | 25   | Great Reed Warbler ( <i>Acrocephalus arundinaceus</i> )        |     | 1   | 1   |
| African Palm Swift ( <i>Cypsiurus parvus</i> )               | 98  | 59    | 157   | Chestnut-bellied Starling ( <i>Lamprotornis pulcher</i> )            | 1070 | 627 | 1697 | Great Spotted Cuckoo ( <i>Clamator glandarius</i> )            | 1   |     | 1   |
| African Scops Owl ( <i>Otus senegalensis</i> )               |     | 2     | 2     | Chestnut-crowned Sparrow-weaver ( <i>Plocepasser superciliosus</i> ) | 2    |     | 2    | Greater Blue-eared Starling ( <i>Lamprotornis chalybaeus</i> ) | 471 | 187 | 658 |
| African Silverbill ( <i>Euodice cantans</i> )                | 64  | 47    | 111   | Common Bulbul ( <i>Pycnonotus barbatus</i> )                         | 102  | 23  | 125  | Greater Honeyguide ( <i>Indicator indicator</i> )              | 2   | 2   | 4   |
| African Swallow-tailed Kite ( <i>Chelictinia riocourii</i> ) | 1   |       | 1     | Common Kestrel ( <i>Falco tinnunculus</i> )                          | 1    | 7   | 8    | Green Wood-hoopoe ( <i>Phoeniculus purpureus</i> )             | 101 | 65  | 166 |
| African Thrush ( <i>Turdus pelios</i> )                      |     | 5     | 5     | Common Redstart ( <i>Phoenicurus phoenicurus</i> )                   | 15   |     | 15   | Green-backed Heron ( <i>Butorides striata</i> )                | 5   |     | 5   |
| Bearded Barbet ( <i>Pogonornis dubius</i> )                  | 38  | 43    | 81    | Common Whitethroat ( <i>Sylvia communis</i> )                        | 183  |     | 183  | Green-winged Pytilia ( <i>Pytilia melba</i> )                  | 7   | 3   | 10  |
| Beaudouin's Snake Eagle ( <i>Circaetus beaudouini</i> )      | 4   | 1     | 5     | Crested Lark ( <i>Galerida cristata</i> )                            | 56   | 24  | 80   | Grey Kestrel ( <i>Falco ardosiaceus</i> )                      | 2   | 5   | 7   |
| Beautiful Sunbird ( <i>Cinnyris pulchellus</i> )             | 4   | 73    | 77    | Cut-throat Finch ( <i>Amadina fasciata</i> )                         | 106  | 6   | 112  | Grey Woodpecker ( <i>Mesopicos goertae</i> )                   | 10  | 9   | 19  |
| Black Kite ( <i>Milvus migrans</i> )                         | 1   | 1     | 2     | Dark Chanting Goshawk ( <i>Melierax metabates</i> )                  | 2    | 1   | 3    | Grey-backed Camaroptera ( <i>Camaroptera brachyura</i> )       | 106 | 49  | 155 |
| Black Scrub Robin ( <i>Cercotrichas podobe</i> )             | 4   |       | 4     | Desert Cisticola ( <i>Cisticola aridulus</i> )                       | 4    |     | 4    | Hoopoe ( <i>Upupa epops</i> )                                  | 4   | 3   | 7   |
| Black-backed Cisticola ( <i>Cisticola eximius</i> )          | 3   |       | 3     | Double-spurred Francolin ( <i>Pternistis bicalcaratus</i> )          |      | 3   | 3    | House Sparrow ( <i>Passer domesticus</i> )                     | 2   |     | 2   |
| Black-crowned Tchagra ( <i>Tchagra senegalus</i> )           | 28  | 22    | 50    | Eastern Olivaceous Warbler ( <i>Iduna pallida</i> )                  | 13   |     | 13   | Lanner Falcon ( <i>Falco biarmicus</i> )                       | 2   |     | 2   |
| Black-headed Heron ( <i>Ardea melanocephala</i> )            |     | 1     | 1     | Ethiopian Swallow ( <i>Hirundo aethiopica</i> )                      |      | 4   | 4    | Laughing Dove ( <i>Streptopelia senegalensis</i> )             | 338 | 183 | 521 |
| Black-headed Lapwing ( <i>Vanellus tectus</i> )              | 121 | 17    | 138   |                                                                      |      |     |      | Lesser Whitethroat ( <i>Sylvia</i>                             | 1   |     | 1   |

|                                                                |     |     |     |                                                             |     |     |     |                                                               |             |             |              |
|----------------------------------------------------------------|-----|-----|-----|-------------------------------------------------------------|-----|-----|-----|---------------------------------------------------------------|-------------|-------------|--------------|
| <i>curruca</i> )                                               |     |     |     | <i>platura</i> )                                            |     |     |     | Village Indigobird ( <i>Vidua chalybeata</i> )                | 47          | 50          | 97           |
| Little Swift ( <i>Apus affinis</i> )                           | 1   | 7   | 8   | Red-billed Firefinch ( <i>Lagonosticta senegala</i> )       | 40  | 19  | 59  | Village Weaver ( <i>Ploceus cucullatus</i> )                  | 136         | 38          | 174          |
| Little Weaver ( <i>Ploceus luteolus</i> )                      | 57  | 66  | 123 | Red-billed Quelea ( <i>Quelea quelea</i> )                  | 118 |     | 118 | Vinaceous Dove ( <i>Streptopelia vinacea</i> )                | 112         | 130         | 242          |
| Lizard Buzzard ( <i>Kaupifalco monogrammicus</i> )             |     | 7   | 7   | Red-cheeked Cordon-bleu ( <i>Uraeginthus bengalus</i> )     | 230 | 93  | 323 | Western Bonelli's Warbler ( <i>Phylloscopus bonelli</i> )     | 6           |             | 6            |
| Long-billed Pipit ( <i>Anthus similis</i> )                    | 2   |     | 2   | Red-necked Buzzard ( <i>Buteo auguralis</i> )               |     | 2   | 2   | Western Grey Plantain-Eater ( <i>Crinifer piscator</i> )      | 11          | 5           | 16           |
| Long-tailed Glossy Starling ( <i>Lamprotornis caudatus</i> )   | 335 | 251 | 586 | Red-necked Falcon ( <i>Falco chicquera</i> )                | 1   | 1   | 2   | Western Marsh Harrier ( <i>Circus aeruginosus</i> )           | 1           |             | 1            |
| Montagu's Harrier ( <i>Circus pygargus</i> )                   | 2   |     | 2   | Rose-ringed Parakeet ( <i>Psittacula krameri</i> )          | 475 | 354 | 829 | White helmetshrike ( <i>Prionops plumatus</i> )               | 19          | 2           | 21           |
| Mosque Swallow ( <i>Cecropis senegalensis</i> )                |     | 1   | 1   | Rufous Scrub Robin ( <i>Cercotrichas podobe</i> )           | 9   |     | 9   | White-billed Buffalo Weaver ( <i>Bubalornis albirostris</i> ) | 1472        | 910         | 2382         |
| Namaqua Dove ( <i>Oena capensis</i> )                          | 14  | 3   | 17  | Rufous-crowned Roller ( <i>Coracias naevius</i> )           | 6   | 17  | 23  | White-headed Barbet ( <i>Lybius leucocephalus</i> )           | 2           |             | 2            |
| Northern Anteater Chat ( <i>Myrmecocichla aethiops</i> )       | 16  | 9   | 25  | Sahel Paradise Whydah ( <i>Vidua orientalis</i> )           | 4   | 21  | 25  | White-rumped Seedeater ( <i>Crithagra Leucopygia</i> )        | 348         | 49          | 397          |
| Northern Black Flycatcher ( <i>Melaenornis edolioides</i> )    | 1   | 14  | 15  | Scarlet-chested Sunbird ( <i>Chalcomitra senegalensis</i> ) | 41  | 11  | 52  | Wood Warbler ( <i>Phylloscopus sibilatrix</i> )               | 5           |             | 5            |
| Northern Crombec ( <i>Sylvietta brachyura</i> )                |     | 1   | 1   | Senegal Coucal ( <i>Centropus senegalensis</i> )            | 16  | 30  | 46  | Woodchat Shrike ( <i>Lanius senator</i> )                     | 5           |             | 5            |
| Northern Grey-headed Sparrow ( <i>Passer griseus</i> )         | 235 | 381 | 616 | Senegal Eremomela ( <i>Eremomela pusilla</i> )              | 6   | 3   | 9   | Yellow-crowned Bishop ( <i>Euplectes afer</i> )               |             | 4           | 4            |
| Northern Red Bishop ( <i>Euplectes franciscanus</i> )          | 16  | 156 | 172 | Senegal Parrot ( <i>Poicephalus senegalus</i> )             | 80  | 67  | 147 | Yellow Wagtail ( <i>Motacilla flava</i> )                     |             | 2           | 2            |
| Northern Red-billed Hornbill ( <i>Tockus erythrorhynchus</i> ) | 83  | 66  | 149 | Shikra ( <i>Accipiter badius</i> )                          |     | 4   | 4   | Yellow-billed Oxpecker ( <i>Buphagus africanus</i> )          | 17          | 17          | 34           |
| Northern Wheatear <i>Oenanthe oenanthe</i>                     | 45  |     | 45  | Speckle-fronted Weaver ( <i>Sporopipes frontalis</i> )      | 121 | 110 | 231 | Yellow-billed Shrike ( <i>Corvinella corvina</i> )            | 59          | 59          | 118          |
| Orange-cheeked Waxbill ( <i>Estrilda melpoda</i> )             | 2   | 8   | 10  | Speckled Pigeon ( <i>Columba guinea</i> )                   | 61  | 28  | 89  | Yellow-crowned Gonolek ( <i>Laniarius barbarus</i> )          | 19          | 16          | 35           |
| Pallid Harrier ( <i>Circus macrourus</i> )                     | 1   |     | 1   | Squacco Heron ( <i>Ardeola ralloides</i> )                  | 1   |     | 1   | Yellow-fronted Tinkerbird ( <i>Pogoniulus chrysoconus</i> )   | 19          | 2           | 21           |
| Pearl-spotted Owlet ( <i>Glaucidium perlatum</i> )             | 3   | 1   | 4   | Subalpine Warbler ( <i>Sylvia cantillans</i> )              | 1   |     | 1   | Zebra Waxbill ( <i>Amandava subflava</i> )                    |             | 8           | 8            |
| Piapiac ( <i>Ptilostomus afer</i> )                            | 87  | 86  | 173 | Sudan Golden Sparrow ( <i>Passer luteus</i> )               | 1   |     | 1   | Zitting Cisticola ( <i>Cisticola juncidis</i> )               | 3           | 136         | 139          |
| Pied Crow ( <i>Corvus albus</i> )                              |     | 1   | 1   | Tawny-flanked Prinia ( <i>Prinia subflava</i> )             | 74  | 99  | 173 | <b>TOTAL</b>                                                  | <b>8407</b> | <b>5239</b> | <b>13646</b> |
| Purple Glossy Starling ( <i>Lamprotornis purpureus</i> )       | 146 | 45  | 191 | Vieillot's Barbet ( <i>Lybius vieilloti</i> )               |     | 1   | 1   |                                                               |             |             |              |
| Purple Heron ( <i>Ardea purpurea</i> )                         | 1   |     | 1   |                                                             |     |     |     |                                                               |             |             |              |
| Pygmy Sunbird ( <i>Anthodiaeta</i>                             | 79  | 9   | 88  |                                                             |     |     |     |                                                               |             |             |              |

## Appendix S2: Number of individual bird species across woodland and shrubland habitats in Dutse, Nigeria

| Species                                                      | Shrub<br>land | Wood<br>land | Grand<br>Total | <i>pulchellus</i><br>Black Kite ( <i>Milvus migrans</i> )    |     |      | <i>superciliosus</i><br>Common Bulbul ( <i>Pycnonotus</i>   |     |     |
|--------------------------------------------------------------|---------------|--------------|----------------|--------------------------------------------------------------|-----|------|-------------------------------------------------------------|-----|-----|
| Abyssinian Roller ( <i>Coracias abyssinicus</i> )            | 18            | 46           | 64             | Black Scrub Robin ( <i>Cercotrichas podobe</i> )             | 2   | 2    | <i>barbatus</i> )                                           | 125 | 125 |
| African Cuckoo ( <i>Cuculus gularis</i> )                    | 2             | 2            | 4              | Black-backed Cisticola ( <i>Cisticola eximius</i> )          | 3   | 3    | Common Kestrel ( <i>Falco tinnunculus</i> )                 | 8   | 8   |
| African Golden Oriole ( <i>Oriolus auratus</i> )             |               | 6            | 6              | Black-crowned Tchagra ( <i>Tchagra senegalus</i> )           | 47  | 3    | Common Redstart ( <i>Phoenicurus phoenicurus</i> )          | 4   | 11  |
| African Grey Hornbill ( <i>Tockus nasutus</i> )              | 14            | 58           | 72             | Black-headed Heron ( <i>Ardea melanocephala</i> )            |     | 1    | Common Whitethroat ( <i>Sylvia communis</i> )               | 118 | 65  |
| African Harrier Hawk ( <i>Polyboroides typus</i> )           |               | 1            | 1              | Black-headed Lapwing ( <i>Vanellus tectus</i> )              | 32  | 106  | Crested Lark ( <i>Galerida cristata</i> )                   | 43  | 37  |
| African Palm Swift ( <i>Cypsiurus parvus</i> )               | 15            | 132          | 157            | Black-shouldered Kite ( <i>Elanus caeruleus</i> )            | 5   | 8    | Cut-throat Finch ( <i>Amadina fasciata</i> )                | 2   | 110 |
| African Scops Owl ( <i>Otus senegalensis</i> )               |               | 2            | 2              | Blue-naped Mousebird ( <i>Urocolius macrourus</i> )          | 5   | 5    | Dark Chanting Goshawk ( <i>Melierax metabates</i> )         | 1   | 2   |
| African Silverbill ( <i>Euodice cantans</i> )                | 11            | 100          | 111            | Brown Babbler ( <i>Turdoides plebejus</i> )                  | 20  | 439  | Desert Cisticola ( <i>Cisticola aridulus</i> )              |     | 4   |
| African Swallow-tailed Kite ( <i>Chelictinia riocourii</i> ) |               | 1            | 1              | Bruce's Green Pigeon ( <i>Treron waalia</i> )                |     | 32   | Double-spurred Francolin ( <i>Pternistis bicalcaratus</i> ) | 3   | 3   |
| African Thrush ( <i>Turdus pelios</i> )                      |               | 5            | 5              | Cattle Egret ( <i>Bubulcus ibis</i> )                        | 100 | 277  | Eastern Olivaceous Warbler ( <i>Iduna pallida</i> )         |     | 13  |
| Bearded Barbet ( <i>Pogonornis dubius</i> )                  | 4             | 77           | 81             | Chestnut-backed Sparrow Lark ( <i>Eremopterix leucotis</i> ) |     | 25   | Ethiopian Swallow ( <i>Hirundo aethiopica</i> )             | 4   | 4   |
| Beaudouin's Snake Eagle ( <i>Circaetus beaudouini</i> )      |               | 5            | 5              | Chestnut-bellied Starling ( <i>Lamprotornis pulcher</i> )    | 299 | 1398 | Fine-spotted Woodpecker ( <i>Campethera punctuligera</i> )  | 2   | 2   |
| Beautiful Sunbird ( <i>Cinnyris</i>                          | 10            | 67           | 77             | Chestnut-crowned Sparrow-weaver ( <i>Plocepasser</i>         | 2   | 2    | Fork-tailed Drongo ( <i>Dicrurus adsimilis</i> )            | 8   | 12  |

|                                                                   |     |     |     |                                                                 |    |     |     |                                                                   |    |     |     |
|-------------------------------------------------------------------|-----|-----|-----|-----------------------------------------------------------------|----|-----|-----|-------------------------------------------------------------------|----|-----|-----|
| Four-banded Sandgrouse<br>( <i>Pterocles quadricinctus</i> )      | 2   |     | 2   | Lanner Falcon ( <i>Falco</i><br><i>biarmicus</i> )              |    | 2   | 2   | Northern Red Bishop<br>( <i>Euplectes franciscanus</i> )          | 16 | 156 | 172 |
| Gabar Goshawk ( <i>Micronisus</i><br><i>gabar</i> )               | 5   | 21  | 26  | Laughing Dove ( <i>Streptopelia</i><br><i>senegalensis</i> )    | 88 | 433 | 521 | Northern Red-billed Hornbill<br>( <i>Tockus erythrorhynchus</i> ) | 16 | 133 | 149 |
| Grasshopper Buzzard<br>( <i>Butastur rufipennis</i> )             |     | 1   | 1   | Lesser Whitethroat ( <i>Sylvia</i><br><i>curruca</i> )          |    | 1   | 1   | Northern Wheatear <i>Oenanthe</i><br><i>oenanthe</i>              | 26 | 19  | 45  |
| Great Reed Warbler<br>( <i>Acrocephalus arundinaceus</i> )        | 1   |     | 1   | Little Swift ( <i>Apus affinis</i> )                            | 2  | 6   | 8   | Orange-cheeked Waxbill<br>( <i>Estrilda melpoda</i> )             | 8  | 2   | 10  |
| Great Spotted Cuckoo<br>( <i>Clamator glandarius</i> )            |     | 1   | 1   | Little Weaver ( <i>Ploceus</i><br><i>luteolus</i> )             | 24 | 99  | 123 | Pallid Harrier ( <i>Circus</i><br><i>macrourus</i> )              |    | 1   | 1   |
| Greater Blue-eared Starling<br>( <i>Lamprotornis chalybaeus</i> ) | 58  | 600 | 658 | Lizard Buzzard ( <i>Kaupifalco</i><br><i>monogrammicus</i> )    | 1  | 6   | 7   | Pearl-spotted Owlet<br>( <i>Glaucidium perlatum</i> )             |    | 4   | 4   |
| Greater Honeyguide<br>( <i>Indicator indicator</i> )              | 2   | 2   | 4   | Long-billed Pipit ( <i>Anthus</i><br><i>similis</i> )           |    | 2   | 2   | Piapiac ( <i>Ptilostomus afer</i> )                               | 13 | 160 | 173 |
| Green Wood-hoopoe<br>( <i>Phoeniculus purpureus</i> )             | 19  | 147 | 166 | Long-tailed Glossy Starling<br>( <i>Lamprotornis caudatus</i> ) | 51 | 535 | 586 | Pied Crow ( <i>Corvus albus</i> )                                 |    | 1   | 1   |
| Green-backed Heron<br>( <i>Butorides striata</i> )                |     | 5   | 5   | Montagu's Harrier ( <i>Circus</i><br><i>pygargus</i> )          | 1  | 1   | 2   | Purple Glossy Starling<br>( <i>Lamprotornis purpureus</i> )       |    | 191 | 191 |
| Green-winged Pytilia ( <i>Pytilia</i><br><i>melba</i> )           | 8   | 2   | 10  | Mosque Swallow ( <i>Cecropis</i><br><i>senegalensis</i> )       | 1  |     | 1   | Purple Heron ( <i>Ardea</i><br><i>purpurea</i> )                  |    | 1   | 1   |
| Grey Kestrel ( <i>Falco</i><br><i>ardosiaceus</i> )               |     | 7   | 7   | Namaqua Dove ( <i>Oena</i><br><i>capensis</i> )                 | 11 | 6   | 17  | Pygmy Sunbird ( <i>Anthodiaeta</i><br><i>platura</i> )            | 12 | 76  | 88  |
| Grey Woodpecker ( <i>Mesopicos</i><br><i>goertae</i> )            | 3   | 16  | 19  | Northern Anteater Chat<br>( <i>Myrmecocichla aethiops</i> )     | 1  | 24  | 25  | Red-billed Firefinch<br>( <i>Lagonosticta senegala</i> )          | 3  | 56  | 59  |
| Grey-backed Camaroptera<br>( <i>Camaroptera brachyura</i> )       | 102 | 53  | 155 | Northern Black Flycatcher<br>( <i>Melaenornis edoloides</i> )   | 5  | 10  | 15  | Red-billed Quelea ( <i>Quelea</i><br><i>quelea</i> )              |    | 118 | 118 |
| Hoopoe ( <i>Upupa epops</i> )                                     | 2   | 5   | 7   | Northern Crombec ( <i>Sylvietta</i><br><i>brachyura</i> )       | 1  |     | 1   | Red-cheeked Cordon-bleu<br>( <i>Uraeginthus bengalus</i> )        | 15 | 308 | 323 |
| House Sparrow ( <i>Passer</i><br><i>domesticus</i> )              |     | 2   | 2   | Northern Grey-headed<br>Sparrow ( <i>Passer griseus</i> )       | 68 | 548 | 616 | Red-necked Buzzard ( <i>Buteo</i><br><i>auguralis</i> )           |    | 2   | 2   |

|                                                             |    |     |     |                                                               |     |      |      |                                                             |             |              |              |
|-------------------------------------------------------------|----|-----|-----|---------------------------------------------------------------|-----|------|------|-------------------------------------------------------------|-------------|--------------|--------------|
| Red-necked Falcon ( <i>Falco chicquera</i> )                | 2  | 2   |     | Tawny-flanked Prinia ( <i>Prinia subflava</i> )               | 105 | 68   | 173  | ( <i>Euplectes afer</i> )                                   |             |              |              |
| Rose-ringed Parakeet ( <i>Psittacula krameri</i> )          | 72 | 757 | 829 | Vieillot's Barbet ( <i>Lybius vieilloti</i> )                 | 1   |      | 1    | Yellow Wagtail ( <i>Motacilla flava</i> )                   |             | 2            | 2            |
| Rufous Scrub Robin ( <i>Cercotrichas podobe</i> )           | 6  | 3   | 9   | Village Indigobird ( <i>Vidua chalybeata</i> )                | 1   | 96   | 97   | Yellow-billed Oxpecker ( <i>Buphagus africanus</i> )        | 4           | 30           | 34           |
| Rufous-crowned Roller ( <i>Coracias naevius</i> )           | 8  | 15  | 23  | Village Weaver ( <i>Ploceus cucullatus</i> )                  | 28  | 146  | 174  | Yellow-billed Shrike ( <i>Corvinella corvina</i> )          | 14          | 104          | 118          |
| Sahel Paradise Whydah ( <i>Vidua orientalis</i> )           | 19 | 6   | 25  | Vinaceous Dove ( <i>Streptopelia vinacea</i> )                | 34  | 208  | 242  | Yellow-crowned Gonolek ( <i>Laniarius barbarus</i> )        | 12          | 23           | 35           |
| Scarlet-chested Sunbird ( <i>Chalcomitra senegalensis</i> ) | 1  | 51  | 52  | Western Bonelli's Warbler ( <i>Phylloscopus bonelli</i> )     |     | 6    | 6    | Yellow-fronted Tinkerbird ( <i>Pogoniulus chrysoconus</i> ) |             | 21           | 21           |
| Senegal Coucal ( <i>Centropus senegalensis</i> )            | 12 | 34  | 46  | Western Grey Plantain-Eater ( <i>Crinifer piscator</i> )      |     | 16   | 16   | Zebra Waxbill ( <i>Amandava subflava</i> )                  | 6           | 2            | 8            |
| Senegal Eremomela ( <i>Eremomela pusilla</i> )              | 5  | 4   | 9   | Western Marsh Harrier ( <i>Circus aeruginosus</i> )           |     | 1    | 1    | Zitting Cisticola ( <i>Cisticola juncidis</i> )             | 77          | 62           | 139          |
| Senegal Parrot ( <i>Poicephalus senegalus</i> )             |    | 147 | 147 | White helmetshrike ( <i>Prionops plumatus</i> )               |     | 21   | 21   | <b>TOTAL</b>                                                | <b>2570</b> | <b>11066</b> | <b>13646</b> |
| Shikra ( <i>Accipiter badius</i> )                          | 2  | 2   | 4   | White-billed Buffalo Weaver ( <i>Bubalornis albirostris</i> ) | 712 | 1670 | 2382 |                                                             |             |              |              |
| Speckle-fronted Weaver ( <i>Sporopipes frontalis</i> )      | 65 | 166 | 231 | White-headed Barbet ( <i>Lybius leucocephalus</i> )           |     | 2    | 2    |                                                             |             |              |              |
| Speckled Pigeon ( <i>Columba guinea</i> )                   | 1  | 88  | 89  | White-rumped Seedeater ( <i>Crithagra Leucopygia</i> )        | 52  | 345  | 397  |                                                             |             |              |              |
| Squacco Heron ( <i>Ardeola ralloides</i> )                  |    | 1   | 1   | Wood Warbler ( <i>Phylloscopus sibilatrix</i> )               |     | 5    | 5    |                                                             |             |              |              |
| Subalpine Warbler ( <i>Sylvia cantillans</i> )              |    | 1   | 1   | Woodchat Shrike ( <i>Lanius senator</i> )                     | 3   | 2    | 5    |                                                             |             |              |              |
| Sudan Golden Sparrow ( <i>Passer luteus</i> )               |    | 1   | 1   | Yellow-crowned Bishop                                         |     | 4    | 4    |                                                             |             |              |              |

**Appendix S3:** Bird species richness and diversity as a function of tree and shrub abundance in Dutse, Nigeria

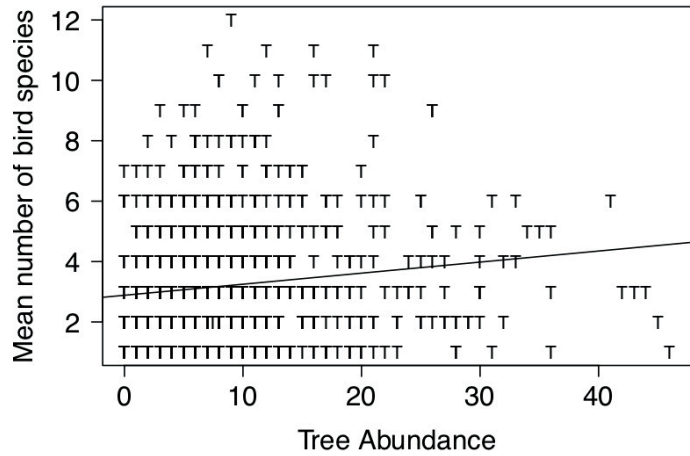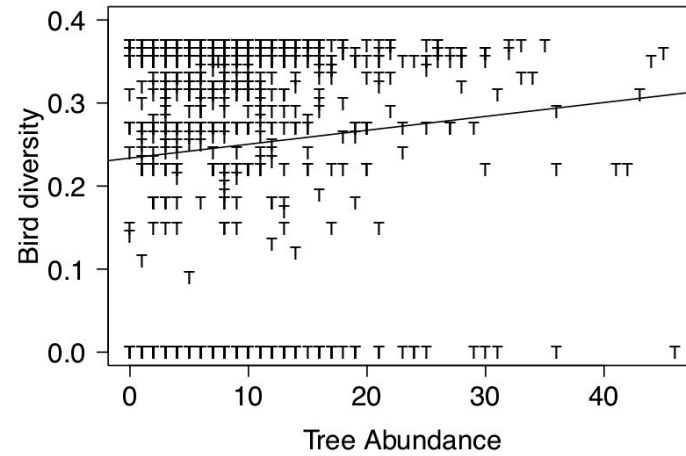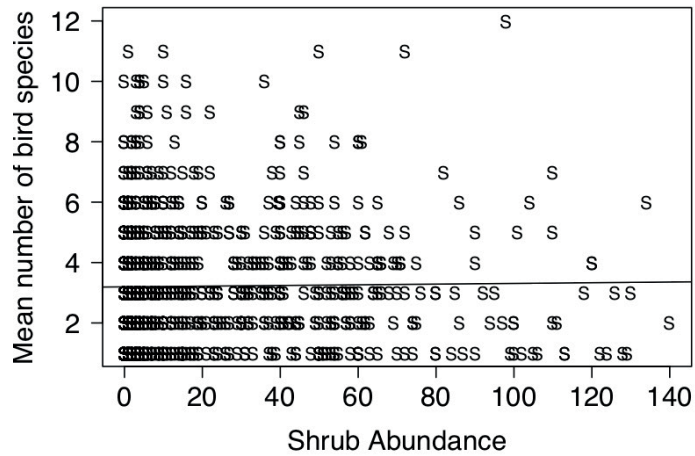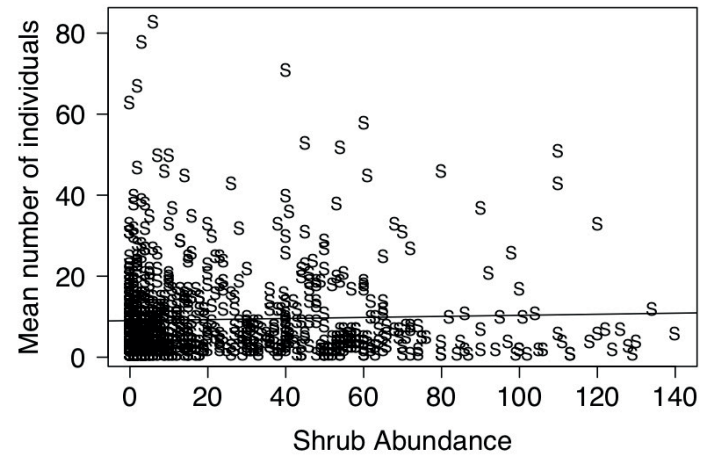

Supplement: Supplementary file 2 [file 2]
